# Supplementary material for: Synaptic branch stability is mediated by non-enzymatic functions of MEC-17/αTAT1 and ATAT-2
Source: PubMed Central journal article supplement (PMC9385713; doi:10.1038/s41598-022-18333-2), 2022-08-17
Supplement: 41598_2022_18333_MOESM1_ESM.pdf [file 41598_2022_18333_MOESM1_ESM.pdf]

**Supplementary Figure 1. PLM synaptic branch defects and quantification of gene expression levels.** Panels provide ventral view examples of the phenotypes observed in animals carrying the *zdIs5(Pmec-4::GFP)* transgene and overexpression of MEC-17: (a) branch thinning; (b) remnants on the main axon shaft; (c) remnants on the pre-synaptic side; (d) remnants on both sides. White arrows point to intact branches; magenta arrows to thin branches; arrowheads to branch remnants; boxes highlight the enlarged images shown to the right of each larger image. Scale bars represent 50  $\mu\text{m}$ . (e) Relative changes in gene expression across the different strains with *mec-17* overexpression, or (f) *atat-2* overexpression. Columns show the mean  $\pm$  SE for three replicate experiments. (g) Quantification of the number of animals with intact synaptic branches in *mec-17(ok2109)* (left two bars) or *atat-2(ok2415)* (right two bars) mutant animals without (-) a cell-autonomous rescue construct (*Pmec-4::mec-17* or *Pmec-4::atat-2*) or with (+) the construct. Bars show mean  $\pm$  SE; symbols show the mean of three-independent experiments, each with  $n \geq 30$  (total  $n \geq 90$ ). *P* values \*\* < 0.05, from one-way ANOVA with Tukey's post-hoc test.

**Supplementary Figure 2. Immobilization can suppress the loss of PLM synaptic branches.** (a) Quantification of the proportion of animals with intact synaptic branches in *mec-17* overexpression, *mec-17(ok2109)*, and *atat-2(ok2415)* backgrounds treated with an empty vector (-) or with *unc-54* RNAi (+). Bars show mean  $\pm$  SE; symbols show the mean of three-independent experiments, each with  $n \geq 30$  (total  $n \geq 90$ ). (b) Proportion of intact synaptic branches in *atat-2(ok2415)* animals untreated or treated with anesthetic for 6 hours;  $n \geq 23$  (c) Quantification of intact synaptic branches in untreated *atat-2(ok2415)* animals compared to those treated with anesthetic 39-45 h post-hatch for three independent experiments  $n \geq 20$  (total  $n \geq 47$ ) or (d) 48-54 h post-hatch ( $n \geq 15$ ; total  $n \geq 46$ ). (e) Proportion of *mec-17(ok2109)* animals with intact synaptic branches when untreated or

treated with anesthetic 39-45 h post-hatch ( $n \geq 20$ ; total  $n \geq 40$ ) or (f) 48-54 h post-hatch ( $n \geq 20$ ; total  $n \geq 40$ ).  $P$  values  $** < 0.05$ ,  $*** < 0.001$  from one-way ANOVA with Tukey's post-hoc test.

**Supplementary Figure 3. Analysis of PLM synaptic branch development. (a)**

Quantification of the proportion of animals displaying a branch from the main PLM axon shaft (present) and those with a branch extending into the ventral nerve cord (complete). Both PLML and PLMR analyzed at 4, 6, 8, 12, 16 and 24 h post-hatch (different cohorts of animals used at each time point);  $n \geq 30$ . Table below graph indicates statistical differences compared to wild-type animals calculated from Fisher's exact tests. (b) Quantification of the PLM branch position 8 h post-hatch. Position calculated relative to the PLM soma and axon terminus. Circles represent individual axons analyzed;  $n \geq 38$ ; mean  $\pm$  SE shown in red; no significant differences observed from one-way ANOVA with Tukey's post-hoc test.

**Supplementary Figure 4. Analysis of PLM synaptic branch in animals stained for  $\alpha$ -tubulin acetylation.** Proportion of animals with acetylated tubulin staining in animals with either normal synaptic branches, ectopic branches or no branches quantified across the genotypes displayed;  $n > 15$  animals analyzed for each genotype.

**Supplementary Figure 5. Analysis of genetic interactions between *mec-12* and either *mec-17* or *mec-12*.** (a) The percentage of intact synaptic branches for animals with *mec-17* overexpression, *mec-12*[K40Q], and *mec-12*[K40Q], compared with *mec-17* overexpressed in the *mec-12*[K40Q], and *mec-12*[K40Q] backgrounds. Bars show mean  $\pm$  SE; symbols show the mean of 3-independent experiments, each with  $n \geq 30$  (total  $n \geq 30$ ). (b) Quantification of intact synaptic branches in *mec-7(ok2152)* and *mec-12(tm5083)* single

mutants, and in animals carrying both these mutations. For each independent experiment,  $n \geq 25$  (total  $n \geq 85$ ). *P* values \*  $< 0.05$ , \*\*  $< 0.01$ , \*\*\*  $< 0.001$  from one-way ANOVA with Tukey's post-hoc test.

# Supplementary Figure 1

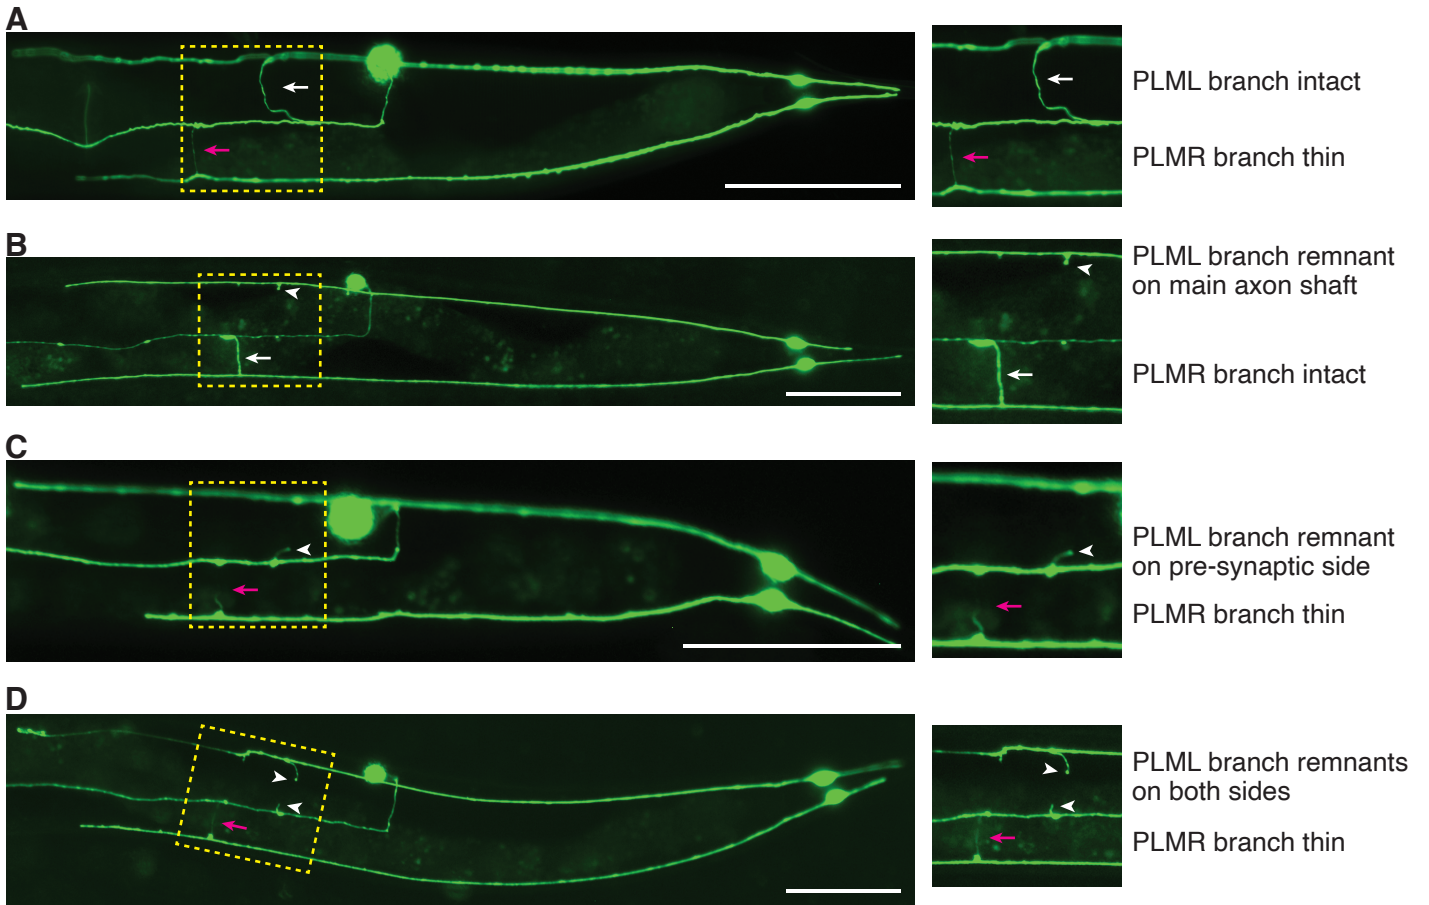

**E** *mec-17* overexpression lines

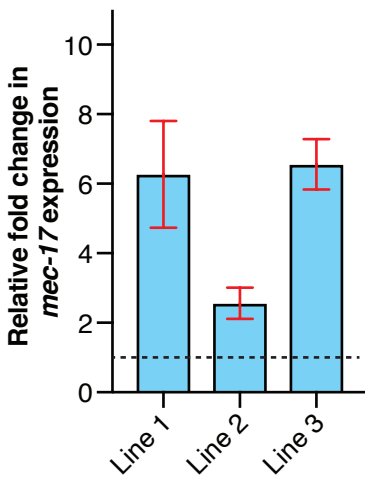

**F** *atat-2* overexpression lines

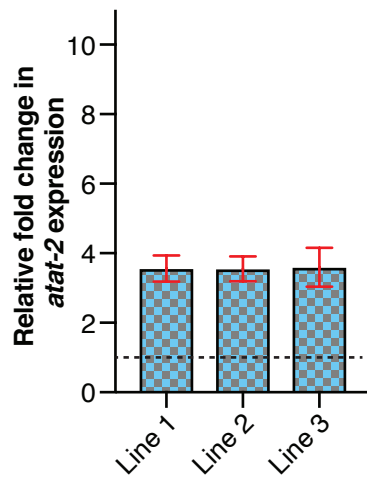

**G**

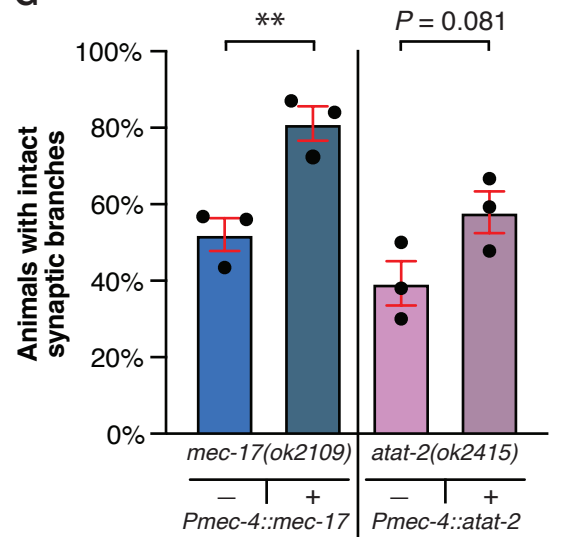

## Supplementary Figure 2

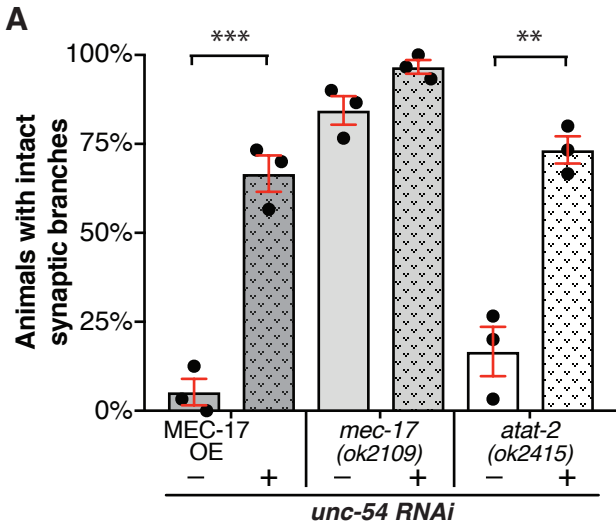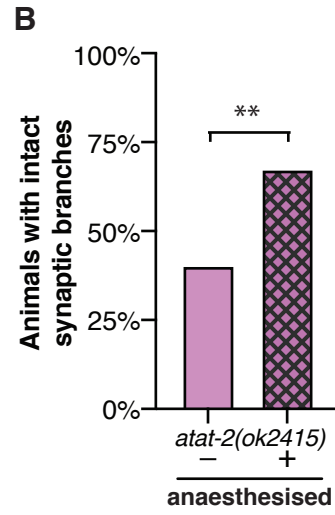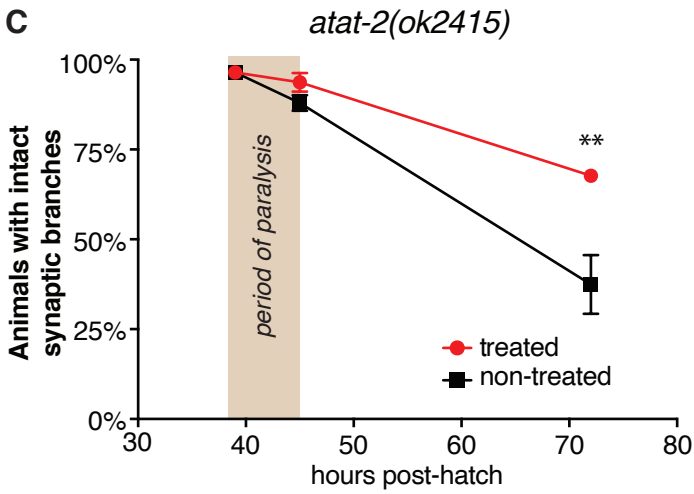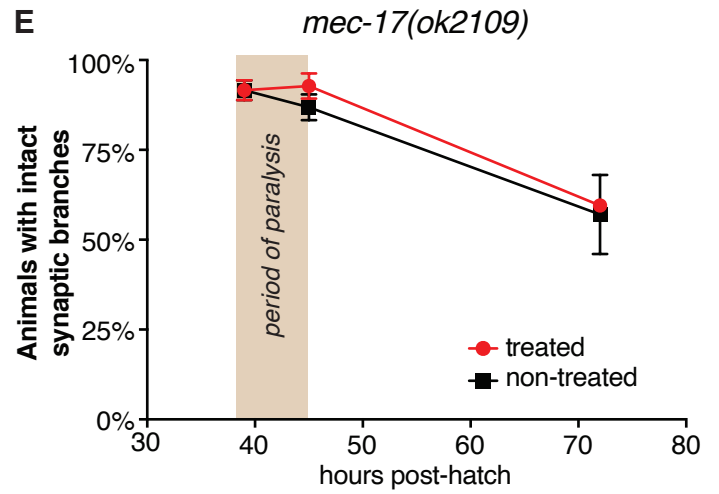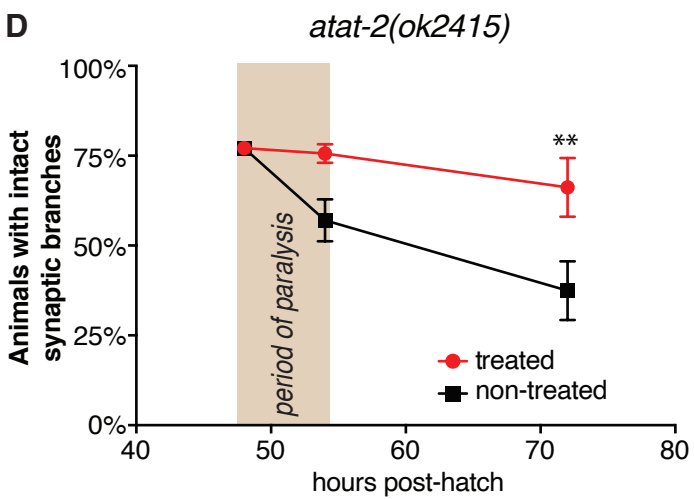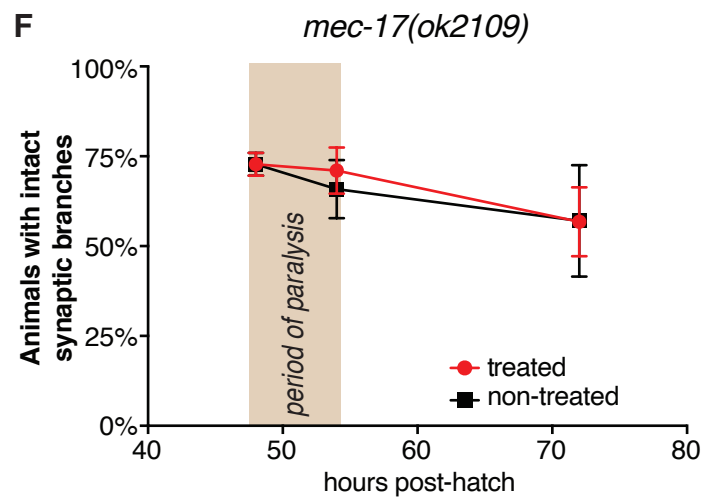

# Supplementary Figure 3

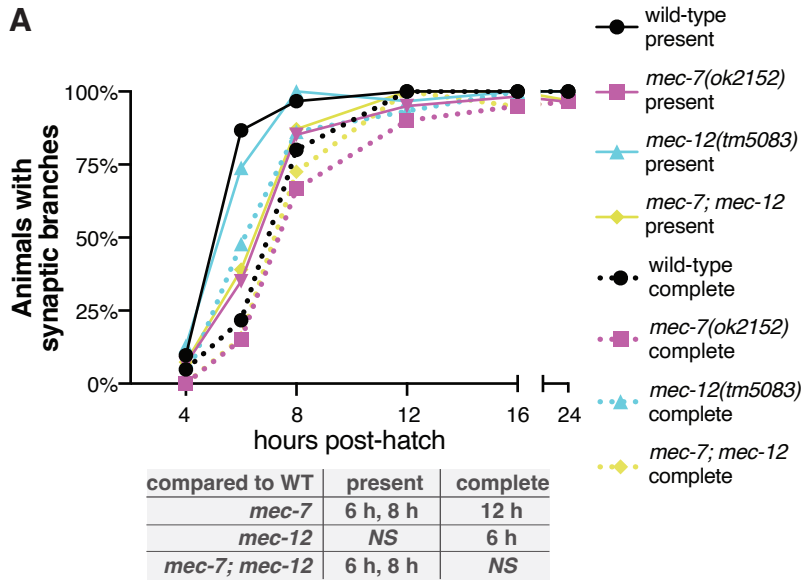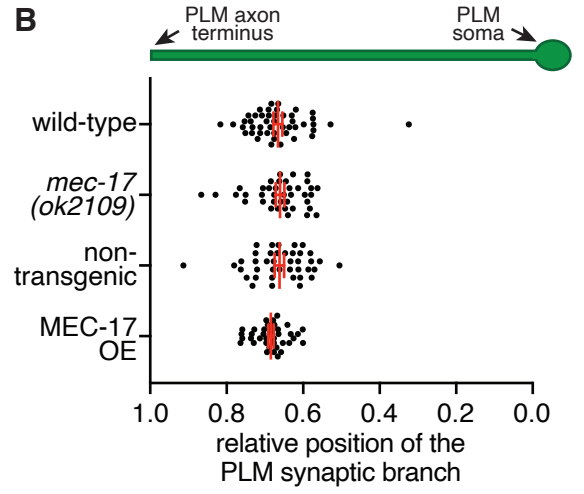

## Supplementary Figure 4

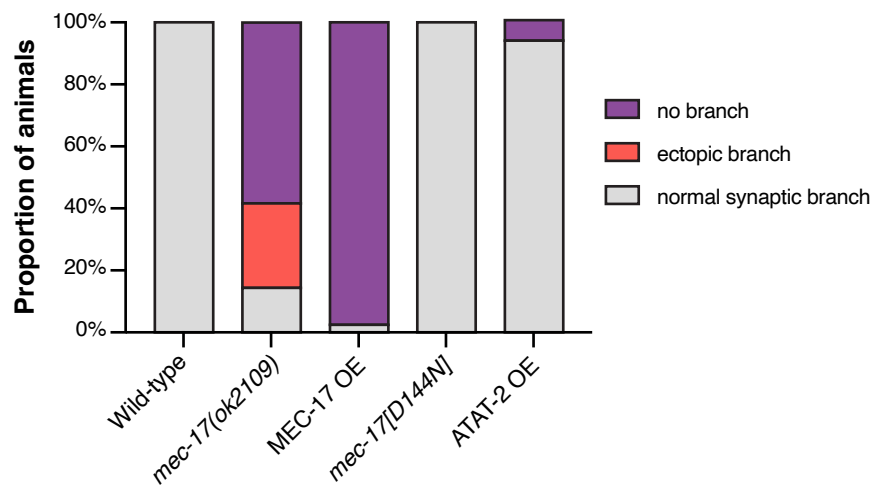

# Supplementary Figure 5

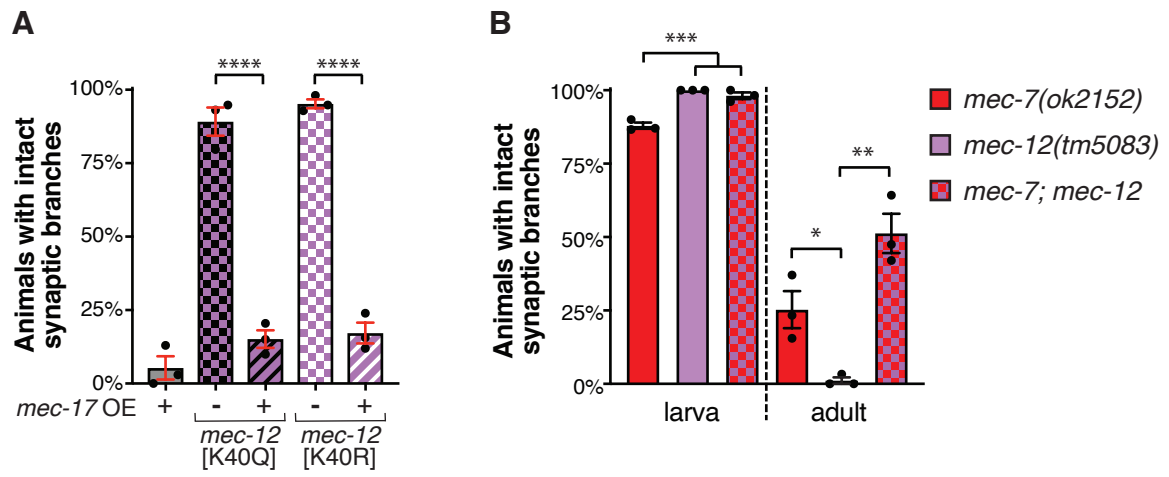



**Supplementary Table 1.** Strains used in this study.

| <b>Strain</b> | <b>Genotype</b>                                                        | <b>Origin</b>    |
|---------------|------------------------------------------------------------------------|------------------|
| <b>QH3135</b> | <i>zdls5(Pmec-4::GFP)</i>                                              | Massimo Hilliard |
| <b>BXN001</b> | <i>zdls5 I ; vdEx539(Pmec-4::mec-17; Plad-2::mCherry)</i>              | This study       |
| <b>BXN205</b> | <i>zdls5 I ; cjnEx038(Pmec-4::mec-17; Pmyo-2::mCherry)</i>             | This study       |
| <b>BXN232</b> | <i>zdls5 I ; cjnEx036(Pmec-4::mec-17; Pmyo-2::mCherry)</i>             | This study       |
| <b>BXN258</b> | <i>zdls5 I ; cjnEx068(Pmec-4::atat-2; Pmyo-2::mCherry)</i>             | This study       |
| <b>BXN259</b> | <i>zdls5; cjnEx069(Pmec-4::atat-2; Pmyo-2::mCherry)</i>                | This study       |
| <b>BXN260</b> | <i>zdls5 I ; cjnEx070(Pmec-4::atat-2; Pmyo-2::mCherry)</i>             | This study       |
| <b>QH3568</b> | <i>zdls5 I ; mec-17(ok2109) IV</i>                                     | Massimo Hilliard |
| <b>QH3574</b> | <i>zdls5 I ; atat-2(ok2415) X</i>                                      | Massimo Hilliard |
| <b>QH3623</b> | <i>zdls5 I ; mec-17(ok2109) IV ; atat-2(ok2415) X</i>                  | Massimo Hilliard |
| <b>BXN507</b> | <i>cjnEx036; jsIs37(Pmec-7::snb-1::GFP); uls115(Pmec-17::tagRFP)</i>   | This study       |
| <b>BXN492</b> | <i>cjnEx036; vdEx262(Pmec-4::mCherry::rab-3; Punc-122::GFP); zdls5</i> | This study       |
| <b>BXN789</b> | <i>zdls5 I ; atat-2(syb2451) III</i>                                   | This study       |
| <b>BXN733</b> | <i>zdls5 I ; mec-17(syb1496) IV</i>                                    | This study       |
| <b>BXN633</b> | <i>zdls5 I ; mec-12(tm5083) III</i>                                    | This study       |
| <b>BXN718</b> | <i>zdls5 I ; mec-12(syb1477) III</i>                                   | This study       |
| <b>BXN722</b> | <i>zdls5 I ; mec-12(syb1498) III</i>                                   | This study       |
| <b>BXN705</b> | <i>zdls5 I ; mec-12(tm5083) III, mec-17(ok2109) IV</i>                 | This study       |
| <b>BXN784</b> | <i>zdls5 I ; mec-12(tm5083) III; atat-2(ok2415) X</i>                  | This study       |
| <b>BXN703</b> | <i>zdls5 I ; mec-12(tm5083) III, mec-7(ok2152) X</i>                   | This study       |
| <b>BXN694</b> | <i>zdls5 I ; zyx-1(gk190) II</i>                                       | This study       |
| <b>BXN528</b> | <i>zdls5 I ; zyx-1(gk190) II; mec-17(ok2109) IV</i>                    | This study       |
| <b>BXN786</b> | <i>zdls5 I ; mec-12(syb1498) III; atat-2(ok2415) X</i>                 | This study       |
| <b>BXN785</b> | <i>zdls5 I ; mec-12(syb1477) III; atat-2(ok2415) X</i>                 | This study       |
